# Supplementary material for: Sacbrood Virus: A Growing Threat to Honeybees and Wild Pollinators
Source: MDPI journal article supplement (doi:10.3390/v14091871), 2022-08-25
Supplement: s1 [file s1]

Table S1. Information of Sacbrood virus prevalence detection. The primer sequences are shown in Table S2.

| Number | Region     | Year | Host | Prevalence | Sample size | Primer number | NCBI Accession | Reference |
|--------|------------|------|------|------------|-------------|---------------|----------------|-----------|
| 1      | Algeria    | 2013 | AM   | 13.79%     | 29          | 2             | -              | [140]     |
| 2      | Argentina  | 2015 | AM   | 1.10%      | 385         | 3             | -              | [141]     |
| 3      | Australia  | 2015 | AM   | 35%        | 1240        | 9             | -              | [142]     |
| 4      | Austria    | 2004 | AM   | 49%        | 90          | 1             | -              | [143]     |
| 5      | Bangladesh | 1995 | *    | +          | *           | -             | -              | [144]     |
| 6      | Belarus    | 1996 | *    | +          | *           | -             | -              | [72]      |
| 7      | Belgium    | 2017 | AM   | 97.13%     | 557         | 8             | -              | [145]     |
| 8      | Belize     | 1993 | *    | +          | *           | -             | -              | [146]     |
| 9      | Bhutan     | 1990 | *    | +          | *           | -             | -              | [14]      |
| 10     | Brazil     | 2011 | AM   | 18.18%     | 11          | 12            | -              | [8]       |
| 11     | Bulgaria   | 2018 | AM   | 12%        | 50          | 2             | MG649495-99    | [147]     |
| 12     | Canada     | 2010 | AM   | 16%        | 103         | 6             | -              | [148]     |
| 13     | Chile      | 2010 | AM   | 14.29%     | 21          | 4             | -              | [149]     |
| 14     | China      | 2019 | AC   | 20%        | 15          | 1             | MW892515-24    | [150]     |
| 15     | Colombia   | 2014 | AM   | 23.40%     | 483         | 4             | -              | [151]     |
| 16     | Costa Rica | 1996 | *    | +          | *           | -             | -              | [152]     |
| 17     | Croatia    | 2010 | AM   | 40.24%     | 82          | 1             | -              | [153]     |
| 18     | Cuba       | 2019 | AM   | 9.09%      | 22          | 11            | -              | [154]     |
| 19     | Cyprus     | 1996 | *    | +          | *           | -             | -              | [72]      |
| 20     | Czech Rep. | 2017 | AM   | 3.03%      | 33          | 1             | MK550481       | [32]      |
| 21     | Denmark    | 2012 | AM   | 39%        | 269         | 1             | -              | [155]     |
| 22     | Ecuador    | 2017 | AM   | 11.76%     | 17          | 5             | -              | [156]     |
| 23     | Egypt      | 1988 | *    | +          | *           | -             | -              | [157]     |
| 24     | Fiji       | 1986 | AM   | 79%        | 96          | -             | -              | [158]     |
| 25     | Finland    | 1993 | *    | +          | *           | -             | -              | [146]     |
| 26     | France     | 2015 | AC   | 91.30%     | 23          | 5             | -              | [77]      |
| 27     | Germany    | 2017 | AM   | 11.10%     | 1064        | 3             | -              | [159]     |
| 28     | Greece     | 2011 | AM   | 6.67%      | 15          | 6             | -              | [160]     |
| 29     | Guatemala  | 1996 | *    | +          | *           | -             | -              | [152]     |
| 30     | Honduras   | 1993 | *    | +          | *           | -             | -              | [146]     |

| Number | Region           | Year | Host | Prevalence   | Sample size | Primer number | NCBI Accession | Reference |
|--------|------------------|------|------|--------------|-------------|---------------|----------------|-----------|
| 31     | Hungary          | 2004 | AM   | 2%           | 52          | 1             | -              | [161]     |
| 32     | India            | 2008 | AM   | 0.08%-14.70% | *           | -             | -              | [162]     |
| 33     | Indonesia        | 2014 | AC   | +            | *           | 1             | KJ629177       | [88]      |
| 34     | Iran             | 2012 | AM   | 18.50%       | 160         | 1             | -              | [163]     |
| 35     | Ireland          | 1993 | *    | +            | *           | -             | -              | [146]     |
| 36     | Israel           | 2009 | AM   | 4%           | 71          | *             | -              | [164]     |
| 37     | Italy            | 2021 | AM   | 100%         | 180         | 1             | -              | [165]     |
| 38     | Japan            | 2018 | AM   | 3.80%        | 26          | 1             | -              | [166]     |
| 39     | Jordan           | 1993 | *    | +            | *           | -             | -              | [157]     |
| 40     | Kenya            | 2014 | AM   | 14%          | 100         | 1             | -              | [167]     |
| 41     | Korea            | 2012 | AC   | 35.29%       | 527         | 1             | JN542440-42    | [168]     |
| 42     | Latvia           | 1995 | *    | +            | *           | -             | -              | [144]     |
| 43     | Lithuania        | 2014 | AM   | 33.70%       | 359         | 6             | KP223782-88    | [169]     |
| 44     | Luxembourg       | 2011 | AM   | 100%         | 20          | 3             | -              | [170]     |
| 45     | Malaysia         | 2014 | AC   | +            | *           | 1             | KJ629178       | [88]      |
| 46     | Mexico           | 2012 | AM   | 20%          | 10          | 2             | -              | [171]     |
| 47     | Moldova          | 1996 | *    | +            | *           | -             | -              | [72]      |
| 48     | Mongolia         | 2013 | AM   | 73.50%       | 151         | 3             | LN875562-68    | [172]     |
| 49     | Morocco          | 2018 | AM   | 14.20%       | 60          | 2             | MT863272       | [173]     |
| 50     | Myanmar          | 1993 | *    | +            | *           | -             | -              | [146]     |
| 51     | Nepal            | 1999 | AM   | +            | *           | 1             | AF284616-29    | [174]     |
| 52     | New Zealand      | 2002 | AM   | 5.5%-15%     | 20          | -             | -              | [175]     |
| 53     | Nicaragua        | 1996 | *    | +            | *           | -             | -              | [152]     |
| 54     | Niue             | 1993 | *    | +            | *           | -             | -              | [146]     |
| 55     | Norway           | 2014 | AM   | +            | *           | 8             | -              | [176]     |
| 56     | Oman             | 1997 | *    | +            | *           | -             | -              | [157]     |
| 57     | Pakistan         | 1996 | *    | +            | *           | -             | -              | [72]      |
| 58     | Panama           | 1996 | *    | +            | *           | -             | -              | [152]     |
| 59     | Papua New Guinea | 2014 | AM   | +            | *           | 1             | KJ629175-76    | [88]      |
| 60     | Peru             | 2014 | AM   | 0%           | 10          | *             | -              | [177]     |
| 61     | Philippines      | 1996 | AC   | +            | 37          | -             | -              | [178]     |

| Number | Region              | Year | Host | Prevalence | Sample size | Primer number | NCBI Accession | Reference |
|--------|---------------------|------|------|------------|-------------|---------------|----------------|-----------|
| 62     | Poland              | 2004 | AM   | +          | 12          | 1             | -              | [143]     |
| 63     | Romania             | 1993 | *    | +          | *           | -             | -              | [146]     |
| 64     | Russia              | 2016 | AM   | +          | *           | *             | *              | [179]     |
| 65     | Samoa               | 1993 | *    | +          | *           | -             | -              | [146]     |
| 66     | Saudi Arabia        | 1990 | *    | +          | *           | -             | -              | [157]     |
| 67     | Serbia              | 2017 | AM   | 24%        | 150         | 7             | KM001901       | [180]     |
| 68     | Slovenia            | 2020 | AM   | 31.48%     | 305         | 9             | -              | [181]     |
| 69     | Solomon Islands     | 1993 | *    | +          | *           | -             | -              | [146]     |
| 70     | South Africa        | 1999 | AM   | +          | *           | 1             | AF284616-29    | [174]     |
| 71     | Spain               | 2008 | AM   | 0.83%      | 484         | 4             | FJ812813-14    | [108]     |
| 72     | Sweden              | 2009 | AM   | +          | 25          | 3             | -              | [182]     |
| 73     | Switzerland         | 2008 | AM   | 7.7%-43.8% | 29          | 2             | -              | [183]     |
| 74     | Syria               | 2017 | *    | 13.33%     | 240         | *             | -              | [184]     |
| 75     | Thailand            | 2007 | AM   | 15.22%     | 46          | 2             | -              | [185]     |
| 76     | Tonga               | 1996 | *    | +          | *           | -             | -              | [72]      |
| 77     | Trinidad and Tobago | 1995 | *    | +          | *           | -             | -              | [144]     |
| 78     | Tunisia             | 1988 | *    | +          | *           | -             | -              | [157]     |
| 79     | Turkey              | 2018 | AM   | 22.30%     | 76          | 5             | -              | [186]     |
| 80     | Uganda              | 2010 | AM   | 0%         | 138         | 7             | -              | [187]     |
| 81     | Ukraine             | 2016 | AM   | +          | *           | 1             | -              | [188]     |
| 82     | United Kingdom      | 2006 | AM   | 1.40%      | 69          | 2             | DQ434992       | [189]     |
| 83     | United States       | 2016 | AM   | 12%-100%   | 50          | 1             | -              | [46]      |
| 84     | Uruguay             | 2011 | AM   | 19.40%     | 103         | 4             | -              | [190]     |
| 85     | Venezuela           | 1993 | *    | +          | *           | -             | -              | [146]     |
| 86     | Viet Nam            | 2015 | AC   | 18.33%     | 180         | 1             | -              | [13]      |
| 87     | Yemen               | 2017 | AM   | 0%         | 16          | *             | -              | [191]     |

AC: *Apis cerana*; AM: *Apis mellifera*; \*: Absence of record; -: No information available; +: Present.

Table S2. Primer list for SBV detection.

| Primer number | Sequence (5' to 3')                                                                                                   | Reference sequence | Nucleotide positions          | Length (bp) | Reference |
|---------------|-----------------------------------------------------------------------------------------------------------------------|--------------------|-------------------------------|-------------|-----------|
| 1             | F: ACC AAC CGA TTC CTC AGT AG<br>R: CCT TGG AAC TCT GCT GTG TA                                                        | AF092924           | 221-240<br>689-708            | 487         | [174]     |
| 2             | F: GGA TGA AAG GAA ATT ACC AG<br>R: CCA CTA GGT GAT CCA CAC T                                                         | AF092924           | *<br>*                        | 426         | [192]     |
| 3             | F: TTG GAA CTA CGC ATC TCT G<br>R: GCT CTA ACC TCG CAT CAA C                                                          | *                  | 3164-3182<br>3461-3479        | 335         | [193]     |
| 4             | F: CGA GTG TTG TGT GTG TAA AGA GA<br>R: CGA AGG GTG AAG TGT AGC AG                                                    | NC002066           | 5307-5329<br>5628-5647        | 341         | [108]     |
| 5             | F: CGT AAT TGC GGA GTG GAA AGA TT<br>R: AGA TTC CTT CGA GGG TAC CTC ATC                                               | AF092924           | 314-336<br>655-632            | 342         | [109]     |
| 6             | F: GCT GAG GTA GGA TCT TTG CGT<br>R: TCA TCA TCT TCA CCA TCC GA                                                       | AF092924           | 4957-4977<br>5762-5781        | 825         | [194]     |
| 7             | F: GCA CGT TTA ATT GGG GAT CA<br>R: CAG GTT GTC CCT TAC CTC CA                                                        | AF092924           | 1655-1674<br>2328-2347        | 693         | [34]      |
| 8             | F: GGG TCG AGT GGT ACT GGA AA<br>R: ACA CAA CAC TCG TGG GTG AC                                                        | AF092924           | *<br>*                        | *           | [195]     |
| 9             | F: AAC GTC CAC TAC ACC GAA ATG TC<br>R: ACA CTG CGC GTC TTA ACA TTC C<br>P: TGA TGA GAG TGG ACG AAG A                 | AF092924           | 434-456<br>482-503<br>460-478 | 70          | [176]     |
| 10            | F: AGC CAG GTG ATA GAT GCT C<br>R: AAA TAC TCC CGC CAA ATC AC<br>P: (6-Fam) TGG CTC ATC TGG GAT CAC AAT TTC C (Tamra) | *                  | 5030-5048<br>5349-5368<br>*   | 338         | [181]     |

F, Forward; R, Reverse; P: Probe; \*: Absence of record.
